1 **Modeling Cellular Resource Allocation Reveals Low Phenotypic Plasticity of C<sub>4</sub>**  
2 **Plants and Infers Environments of C<sub>4</sub> Photosynthesis Evolution**

3

4 Esther M. Sundermann<sup>1</sup>, Martin J. Lercher<sup>1</sup>, David Heckmann<sup>1,\*</sup>

5

6 <sup>1</sup> Institute for Computer Science and Department of Biology, Heinrich Heine University Düsseldorf,  
7 Germany

8 David Heckmann

9 Email: [david.heckmann@hhu.de](mailto:david.heckmann@hhu.de)

10 \* To whom correspondence should be addressed

|                                                               |      |                                     |                                               |
|---------------------------------------------------------------|------|-------------------------------------|-----------------------------------------------|
| Total word count (excluding summary, references and legends): | 6499 | No. of figures:                     | 5 (Figs 1–5 in color)                         |
| Summary:                                                      | 199  | No. of Tables:                      | 1                                             |
| Introduction:                                                 | 963  | No of Supporting Information files: | 20 (Methods S1–S5, Tables S1–S8, Figs. S1–S7) |
| Materials and Methods:                                        | 2380 |                                     |                                               |
| Results:                                                      | 2144 |                                     |                                               |
| Discussion:                                                   | 900  |                                     |                                               |
| Acknowledgements:                                             | 64   |                                     |                                               |

11

## 12 Summary

- 13 - The regulation of resource allocation in biological systems observed today is the cumulative result  
14 of natural selection in ancestral and recent environments. To what extent are observed resource  
15 allocation patterns in different photosynthetic types optimally adapted to current conditions, and  
16 to what extent do they reflect ancestral environments? Here, we explore these questions for C<sub>3</sub>,  
17 C<sub>4</sub>, and C<sub>3</sub>-C<sub>4</sub> intermediate plants of the model genus *Flaveria*.
- 18 - We developed a detailed mathematical model of carbon fixation, which accounts for various  
19 environmental parameters and for energy and nitrogen partitioning across photosynthetic  
20 components. This allows us to assess environment-dependent plant physiology and performance  
21 as a function of resource allocation patterns.
- 22 - To achieve maximal CO<sub>2</sub> fixation rates under growth conditions differing from those experienced  
23 during their evolution, C<sub>4</sub> species need to re-allocate significantly more nitrogen between  
24 photosynthetic components than their C<sub>3</sub> relatives. As this is linked to a limited phenotypic  
25 plasticity, observed resource distributions in C<sub>4</sub> plants still reflect optimality in ancestral  
26 environments, allowing their quantitative inference.
- 27 - Our work allows us to quantify environmental effects on resource allocation and performance of  
28 photosynthetic organisms. This understanding paves the way for interpreting present  
29 photosynthetic physiology in the light of evolutionary history.

30

## 31 Key Words

32 C<sub>4</sub> photosynthesis, C<sub>3</sub> photosynthesis, C<sub>3</sub>-C<sub>4</sub> photosynthesis, evolution, *Flaveria*, phenotypic plasticity,  
33 resource allocation, systems modeling

## 34 Introduction

35 Metabolic efficiency is an important determinant of organismal fitness (Ibarra *et al.*, 2002; Heckmann *et*  
36 *al.*, 2013). Major constraints on metabolic fluxes can arise from scarcity of chemical compounds, e.g.,  
37 nitrogen necessary to produce enzymes (Baudouin-Cornu *et al.*, 2001), or from the limited solvent  
38 capacity of cellular compartments (Atkinson, 1969; Beg *et al.*, 2007). To ensure optimal metabolic  
39 efficiency, gene regulation has to balance available resources appropriately. Modern methods of  
40 modeling metabolism rely strongly on the assumption of metabolic optimality under physico-chemical  
41 constraints (Oberhardt *et al.*, 2009; de Oliveira Dal'Molin *et al.*, 2010; Dourado *et al.*, 2017). Accordingly,  
42 resource allocation and its constraints are under intense investigation, although these studies are mostly

43 restricted to unicellular organisms. However, the metabolic efficiency of a given metabolic system is not  
44 static, but depends on the environment. Thus, uncertainties about the environmental properties that an  
45 organism has adapted to remain a major obstacle in the application of these methods. Autotrophic  
46 systems, such as plant leaves, are ideal to study the interaction of the environment and resource  
47 allocation, as the diversity of nutrient sources is much lower than for heterotrophs, which results in a  
48 reduced complexity of the space of possible environments. Furthermore, the effect of environmental  
49 factors on plant performance, e.g., the rate of CO<sub>2</sub> assimilation, have been studied intensively (von  
50 Caemmerer, 2000). In particular, C<sub>3</sub> and C<sub>4</sub> photosynthesis represent complementary gene expression and  
51 resource allocation patterns that result in high fitness in specific ecological niches.

52

53 In all plants, the fixation of carbon from CO<sub>2</sub> is catalyzed by the enzyme ribulose-1,5-bisphosphate  
54 carboxylase/oxygenase (Rubisco) as part of the Calvin-Benson cycle. Rubisco also shows an affinity for O<sub>2</sub>,  
55 resulting in a toxic by-product, which needs to be recycled by the photorespiratory pathway and causes a  
56 significant loss of carbon and energy (Maurino & Peterhansel, 2010). Rubisco is an important resource  
57 sink in the leaf proteome of plants: it utilizes up to 30% of leaf nitrogen and up to 65% of total soluble  
58 protein (Ellis, 1979; Makino *et al.*, 2003). While C<sub>3</sub> plants operate the Calvin-Benson cycle in their  
59 mesophyll cells to fix carbon, C<sub>4</sub> plants express it in the bundle sheath cells and use phospho $en$ o/pyruvate  
60 (PEP) carboxylase (PEPC) for the initial fixation of carbon. The resulting C<sub>4</sub> acids are eventually  
61 decarboxylated in the bundle sheath cells, creating a local high-CO<sub>2</sub> environment around Rubisco that  
62 suppresses photorespiration. The C<sub>4</sub> cycle is completed by the regeneration of PEP by pyruvate, phosphate  
63 dikinase (PPDK).

64

65 Compared to C<sub>3</sub> photosynthesis, C<sub>4</sub> metabolism requires additional nitrogen to produce the C<sub>4</sub> enzymes;  
66 this additional investment is counteracted by reduced Rubisco requirements due to the concentration of  
67 CO<sub>2</sub> around Rubisco (Sage, 2004). The energy requirements of C<sub>4</sub> metabolism also differ from those of the  
68 C<sub>3</sub> pathway (Munekage & Taniguchi, 2016), as further ATP is needed for the regeneration of PEP, while  
69 ATP and NADPH requirements of the photorespiratory pathway are reduced. The metabolic efficiencies  
70 of the C<sub>3</sub> and C<sub>4</sub> system depend strongly on the environment. To achieve optimal metabolic efficiency,  
71 plants have to coordinate gene expression of the Calvin-Benson cycle, C<sub>4</sub> cycle, photorespiration, and light  
72 reactions in a complex response to the availability of light energy and nitrogen, as well as factors that  
73 influence the rate of photorespiration. The diversity of photosynthetic resource allocation patterns is  
74 emphasized by the existence of C<sub>3</sub>-C<sub>4</sub> intermediate photosynthesis in some plants, where features of the

75 archetypical  $C_4$  syndrome are only partially expressed. The *Flaveria* genus contains closely related plants  
76 of  $C_3$ ,  $C_4$ , and  $C_3$ - $C_4$  intermediate types, making it an ideal system to study the interaction between  
77 resource allocation and environment in photosynthesis.

78

79 The selection pressures caused by environmental factors over evolutionary time scales are expected to  
80 lead to corresponding adaptations of gene regulation. In contrast, environmental variation on the time  
81 scale of individual generations may select for regulatory programs that adjust plant metabolism to the  
82 environment they currently face, a process called phenotypic plasticity. Reviewing the occurrence of  
83 phenotypic plasticity in  $C_3$  and  $C_4$  plants, Sage and McKown (2006) concluded that  $C_4$  plants show inherent  
84 constraints that prevent the acclimation to environmental changes. Although the occurrence of  
85 phenotypic plasticity in plants is intensively studied, the plasticity in terms of resource allocation is not  
86 fully understood. In particular, it is not clear whether the phenotypic plasticity of different plant lineages  
87 is sufficient to acclimate optimally to the current environment; instead, many plants might still allocate at  
88 least parts of their resources in patterns that were optimal in the environments that dominated their  
89 recent evolutionary history.

90

91 The areas where  $C_4$  dicotyledonous plants are assumed to have evolved are regions of low latitude  
92 showing combinations of heat, drought, and salinity (Sage, 2004). For *Flaveria*, analyses that combine  
93 phylogenetic context and environmental information point toward an evolutionary origin in open habitats  
94 with high temperatures (Powell, 1978; Sage, 2004; McKown *et al.*, 2005). The last common  $C_3$  ancestor of  
95 the current *Flaveria* species lived 2–3 million years ago (Christin *et al.*, 2011), when  $CO_2$  levels were  
96 significantly lower than the current, postindustrial level (Sage & Cowling, 1999; Gerhart & Ward, 2010). In  
97 summary, *Flaveria* species likely faced high light intensities, high temperature, and low atmospheric  $CO_2$   
98 level during their recent evolutionary history.

99

100 Here, we aim for a detailed understanding of the interplay between resource allocation and current and  
101 past evolutionary environments in plant physiology, examining  $C_3$ ,  $C_4$ , and  $C_3$ - $C_4$  intermediate  
102 photosynthesis. To achieve this goal, we developed a mathematical model for these photosynthetic types  
103 that integrates knowledge on resource costs and relevant environmental factors. Using this model, we  
104 seek to understand (1) to what extent resource allocation is phenotypically plastic and to what extent it  
105 appears adapted to an environment the plants were facing during their evolutionary history; and (2) if  
106 resource allocation patterns can be used to identify unique environments of optimal adaption.

## 107 Results

### 108 *Predicting resource allocation and fitness across environments and photosynthetic types:* 109 *a mathematical model*

110 The standard method to model the light- and enzyme-limited CO<sub>2</sub> assimilation rate of C<sub>3</sub>, C<sub>4</sub>, and C<sub>3</sub>-C<sub>4</sub>  
111 intermediate plants is based on the mechanistic biochemical models of Berry and Farquhar (1978),  
112 Farquhar *et al.* (1980), and von Caemmerer (1989; 2000). With great success, these models predict the  
113 CO<sub>2</sub> assimilation rate considering enzymatic activities and various environmental parameters, including  
114 mesophyll CO<sub>2</sub> level and light intensities. In many ecosystems, the most limiting resource for plant growth  
115 is nitrogen (Malhi *et al.*, 2001; Vance, 2001). The increased nitrogen-use efficiency of C<sub>4</sub> species compared  
116 to C<sub>3</sub> relatives indicates that nitrogen availability may have played a major role in C<sub>4</sub> evolution (Vogan &  
117 Sage, 2011). However, existing model implementations predict CO<sub>2</sub> assimilation rates from known or  
118 estimated enzyme activities and electron transport capacity. Thus, these models do not allow to assess  
119 the effects of nitrogen investment into different classes of proteins—including enzymes and components  
120 of the electron transport chain—on the CO<sub>2</sub> assimilation rate of a given photosynthetic type in a specific  
121 environment.

122

123 Here, we present a nitrogen-dependent light- and enzyme-limited model for the steady-state CO<sub>2</sub>  
124 assimilation rate (Fig. 1). The model describes C<sub>3</sub>, C<sub>4</sub>, and all intermediate photosynthetic types depending  
125 on its parameterization, including the nitrogen investment into its different components (see Heckmann  
126 *et al.* (2013) for details and Supporting Information for our parameterization). We modified the light- and  
127 enzyme-limited C<sub>3</sub>-C<sub>4</sub> models developed by von Caemmerer (2000) and added a fixed budget of nitrogen  
128 constraining the total abundance of photosynthetic proteins. Furthermore, we extended the existing  
129 models by explicitly modeling the ATP and NADPH production of the linear and cyclic electron transport  
130 (LET and CET, respectively). Thus, a photosynthetic nitrogen budget is distributed across the enzymes of  
131 the Calvin-Benson cycle in the mesophyll and bundle sheath cell, the C<sub>4</sub> cycle, and the proteins of the  
132 linear and cyclic electron transport in the thylakoid membranes. Combining this model with the  
133 temperature dependency of the photosynthetic apparatus (Massad *et al.*, 2007) results in a detailed  
134 model of photosynthesis that incorporates leaf nitrogen level, light intensity, mesophyll CO<sub>2</sub> and O<sub>2</sub> levels,  
135 as well as the effects of temperature (see Methods for details).

136

137 In order to understand physiological data in the context of adaptive environments, we aim to find optimal  
138 resource allocation in a given environment. To this end, we assume that resource allocation has been

139 optimized by natural selection to maximize the net CO<sub>2</sub> assimilation rate (Zhu *et al.*, 2007; Gerhart & Ward,  
140 2010; Vogan & Sage, 2012). We developed a robust optimization pipeline that reliably finds optimal  
141 resource allocation dependent on environments and photosynthetic types (see Methods for details). In  
142 previous work, optimality assumptions were successfully used in a variety of plant systems biology  
143 contexts; examples are candidate identification of photosynthetic engineering targets (Zhu *et al.*, 2007),  
144 explanation of the coordination of C<sub>3</sub> photosynthesis (Friend, 1991; Maire *et al.*, 2012), the exploration of  
145 evolutionary trajectories of C<sub>4</sub> photosynthesis (Heckmann *et al.*, 2013) and of inter-cellular pathways in C<sub>2</sub>  
146 plants (Mallmann *et al.*, 2014), and the prediction of dynamic proteome allocation in cyanobacteria  
147 (Reimers *et al.*, 2017). We use optimality of CO<sub>2</sub> fixation rate to determine (1) the optimal partitioning of  
148 NADPH between the Calvin-Benson cycle and the photorespiratory pathway, (2) the optimal partitioning  
149 of ATP across the Calvin-Benson cycle, photorespiratory pathway, and the C<sub>4</sub> cycle (if relevant), (3) the  
150 optimal proportion of LET and CET, and (4) the relative investment of nitrogen into Rubisco, the C<sub>4</sub> cycle  
151 enzymes, and the proteins of the light-dependent reactions (see Methods). For a specific photosynthetic  
152 type, the optimization procedure estimates the resource allocation that is optimally adapted to a given  
153 environment. Note that at the point of optimal resource allocation, the light- and enzyme-limited CO<sub>2</sub>  
154 assimilation rates are equal, as otherwise resources could be shifted from the non-limiting to the limiting  
155 sector.

156

157 *Optimal resource allocation in the evolutionarily relevant environment explains*  
158 *physiological data and outperforms models based on the growth environment in C<sub>4</sub> plants*

159 Do photosynthetic types exhibit differences in phenotypic plasticity, *i.e.*, do they differ in their ability to  
160 adjust their photosynthetic resource allocation to optimally fit the environment in which they were  
161 grown? Or is resource investment static and reflects past environments in which the plants' ancestors  
162 evolved? To compare these competing hypotheses, we predict physiological data of plants that are either  
163 optimally adapted to the experimental growth conditions used in the respective studies ('growth  
164 scenario') or to the environments in which they likely evolved ('evolutionary scenario'). This *in silico*  
165 experiment also serves as validation for our modeling framework; if the parameterization for *Flaveria* and  
166 our optimality assumptions are correct, we would expect the model to explain physiological responses in  
167 one of the two or an intermediate scenario. Based on the suggested environment of C<sub>4</sub> evolution in  
168 *Flaveria* (Powell, 1978; Sage, 2004; McKown *et al.*, 2005), the evolutionary environment is defined as

169 having 1750  $\mu\text{mol quanta m}^{-2} \text{s}^{-1}$  light intensity, 30°C temperature, 150  $\mu\text{bar}$  mesophyll  $\text{CO}_2$ , and 200 mbar  
170 mesophyll  $\text{O}_2$ .

171  
172 Vogan and Sage (2012) measured the net  $\text{CO}_2$  assimilation rate as a function of intercellular  $\text{CO}_2$   
173 concentration (A- $C_i$  curve) for *Flaveria robusta* ( $C_3$ ), *F. ramosissima* ( $C_3$ - $C_4$ ), and *F. bidentis* ( $C_4$ ). In this  
174 experiment, plants were grown at light intensities of 560  $\mu\text{mol quanta m}^{-2} \text{s}^{-1}$ , 37°C at daytime, current  
175 atmospheric  $\text{O}_2$  concentration and current or low atmospheric  $\text{CO}_2$  concentrations. However,  $\text{CO}_2$   
176 assimilation curves calculated from a model parameterized for optimal  $\text{CO}_2$  assimilation in these growth  
177 conditions are qualitatively different from the experimental curves (Fig. 2a; Supporting Information Figs.  
178 S2–S4). In contrast, the modeled curves based on a model optimally adapted to the evolutionary scenario  
179 are qualitatively consistent with the measured curves; this difference is especially pronounced in the case  
180 of the  $C_4$  plant *F. bidentis*.

181  
182 In the same study, Vogan and Sage (2012) measured the  $\text{CO}_2$  assimilation rate for temperatures between  
183 15°C and 45°C (A-Temperature curve; Fig. 2b; Supporting Information Fig. S5). The results assuming an  
184 optimal allocation under the evolutionary scenario agree qualitatively with the measured data, again in  
185 contrast to the values predicted from a model optimally adapted to the growth environment. Note that  
186 none of the species in this data set were used to obtain the temperature response curves used in the  
187 model (see Methods).

188  
189 In an independent experiment, Vogan and Sage (2011) measured the dependence of  $\text{CO}_2$  assimilation rate  
190 on leaf nitrogen levels in  $C_3$ ,  $C_3$ - $C_4$  intermediate,  $C_4$ -like, and  $C_4$  *Flaveria* species (Fig. 3). The plants were  
191 grown at 554  $\mu\text{mol quanta m}^{-2} \text{s}^{-1}$  light intensity, 30°C at daytime, at current atmospheric  $\text{CO}_2$  and  $\text{O}_2$   
192 concentrations. Again, the model results assuming optimal resource allocation in the evolutionary  
193 scenario are consistent with the measured data and outperform the results based on optimality in the  
194 growth scenario for  $C_3$ - $C_4$  intermediate,  $C_4$ -like, and  $C_4$  plants.

195  
196 We quantified the disagreement between measured curves and predicted results through the residual  
197 sum of squares (Table 1). In  $C_4$  and  $C_4$ -like plants, the evolutionary scenario predicts all measured curves  
198 better than the growth scenario, except for the A-Temperature curve for  $C_4$  plants grown at low  $\text{CO}_2$   
199 concentration. Jointly considering all measured curves in Figs. 2 and 3 as well as Supporting Information  
200 Figs. S2–S5 (Vogan & Sage, 2011; Vogan & Sage, 2012), we find that for the  $C_4$  and  $C_4$ -like species, squared

201 residuals for the evolutionary scenario are statistically significantly smaller than for the growth scenario  
202 ( $C_4$ :  $P = 6.0 \times 10^{-8}$ ;  $C_4$ -like:  $P = 0.007$ ; Wilcoxon rank sum tests). This finding indicates that observed resource  
203 allocation patterns in  $C_4$  and  $C_4$ -like plants reflect past environments relevant during evolution more than  
204 the environment in which the assayed plants were grown. Conversely, and as expected from Table 1, the  
205 observed differences between predictions from the evolutionary and growth scenario are not statistically  
206 significant for the  $C_3$  and the  $C_3$ - $C_4$  intermediate species ( $C_3$ :  $P = 0.35$ ;  $C_3$ - $C_4$ :  $P = 0.55$ ).

207  
208 Dwyer *et al.* (2007) performed detailed experiments on the photosynthetic resource allocation and  
209 performance of the  $C_4$  species *F. bidentis*. This data allows us to compare the predicted nitrogen  
210 investment into the three major photosynthetic components—Rubisco,  $C_4$  cycle, and electron transport  
211 chain—as well as the corresponding  $CO_2$  assimilation rate to experimentally observed resource allocation  
212 patterns. The plants were grown under 25°C or 35°C at daytime, 550  $\mu\text{mol quanta m}^{-2} \text{s}^{-1}$ , and current  
213 atmospheric  $CO_2$  and  $O_2$  concentrations. Model predictions of chlorophyll content and the amount of  
214 photosystem II agree within a factor of 1.10 to 1.22 with values measured by Dwyer *et al.* (2007) (see  
215 Supporting Information Table S7). For plants grown at 25°C, the resource allocation determined under the  
216 evolutionary scenario agrees with the measured data within a factor of 0.47 to 1.22 (Fig. 4a); at 35°C,  
217 agreement is within a factor of 0.43 to 1.12 (Fig. 4b). In both cases, agreement is much lower for  
218 predictions in the growth scenario. We assessed the statistical significance of the superior performance  
219 of the evolutionary scenario by comparing the distributions of the squared residuals (expressed as  
220 fractions of the experimental means). The resource allocation calculated for the evolutionary scenario  
221 outperforms the growth scenario significantly for the data represented in Fig. 4 ( $P = 7.2 \times 10^{-5}$ , Wilcoxon  
222 rank sum test).

223  
224 Although we could obtain the majority of our model parameters from the literature, the relationship of  
225 cytochrome f and the maximal electron transport rate of the CET had to be estimated (see Methods). We  
226 performed a sensitivity analysis to examine the robustness of the results to changes in the estimated  
227 parameters and to uncertainties in values obtained from the literature, focusing on parameters with high  
228 uncertainty or major expected effect on model predictions (see Supporting Information Method S5). The  
229 predictions based on the evolutionary scenario outperform those based on the growth environment  
230 consistently across all parameter sets (Supporting Information Fig. S1).

231



232 *The model identifies a unique evolutionary environment for C<sub>4</sub> photosynthesis in Flaveria*

233 The model optimally adapted to the evolutionary scenario leads to superior predictions of plant  
234 performance and resource allocation in C<sub>4</sub> plants compared to a parameterization optimized for the  
235 growth scenario across diverse physiological data sets. The inferior performance of the growth scenario  
236 model indicates a lack of phenotypic plasticity of resource allocation in C<sub>4</sub> plants. This finding points to the  
237 possibility that the environment most relevant for recent evolutionary adaptation of a given C<sub>4</sub> plant could  
238 be inferred quantitatively from observations on plant physiology and resource allocation. Thus, to infer a  
239 typical evolutionary environment for C<sub>4</sub> *Flaveria bidentis*, we calculated optimal resource allocation under  
240 conditions covering plausible ranges of mesophyll CO<sub>2</sub> partial pressure, temperature, and light intensities  
241 to identify the conditions that best explain the empirical data (Fig. 5). As atmospheric O<sub>2</sub> concentration  
242 remained almost constant for at least the last few million years (Gerhart & Ward, 2010), this  
243 environmental parameter is set to a constant value. We use the empirical data of Dwyer *et al.* (2007), as  
244 this data set comprises detailed measurements for each nitrogen pool and the resulting CO<sub>2</sub> assimilation  
245 rate, allowing us to quantify the discrepancy between modeled and measured values as the mean squared  
246 residuals (expressed as fractions of experimental means).

247  
248 We find that the model showing minimal prediction error defines a unique environment (Fig. 5), exhibiting  
249 1562.5  $\mu\text{mol quanta m}^{-2} \text{s}^{-1}$  light intensity, 30°C, a mesophyll CO<sub>2</sub> level of 100  $\mu\text{bar}$ , and an O<sub>2</sub> level of 200  
250 mbar. As indicated in Fig. 5, the areas in which the model successfully describes the empirical values  
251 generally show high light intensities, intermediate to high temperatures, and a trend towards low CO<sub>2</sub>  
252 partial pressures. High light intensities and low CO<sub>2</sub> levels, as in the evolutionary scenario, favor an  
253 increased nitrogen investment into the dark reactions, which goes along with a reduced investment into  
254 the electron transport chain. The effect of temperature is of special importance for plants using the C<sub>4</sub>  
255 cycle, as temperature increases PEPC activity drastically and therefore reduces the necessary nitrogen  
256 investment into the C<sub>4</sub> cycle. This allows an increased investment into the electron transport chain and  
257 Rubisco, which show reduced activity at elevated temperatures due to thermal instabilities.

258  
259 Our results indicate that C<sub>4</sub> *Flaveria* species show a lower degree of photosynthetic phenotypic plasticity  
260 than closely related C<sub>3</sub> species. On a molecular level, this plasticity predominantly requires the  
261 re-allocation of nitrogen between the major photosynthetic protein pools. To assess the costs of  
262 phenotypic plasticity, we thus quantified the total fraction of nitrogen that needs to be re-allocated  
263 between photosynthetic pools to optimally adjust photosynthesis from the evolutionary scenario to a

264 given growth environment ( $\delta_n$ , see Methods). We find that photosynthetic types that utilize the  $C_4$  cycle  
265 require a consistently higher amount of re-allocation compared to  $C_3$  plants ( $P = 1.5 \times 10^{-5}$ , sign test, see  
266 Supporting Information Table S5). Our results thus reveal a link between required nitrogen re-allocation  
267 and limited photosynthetic phenotypic plasticity (see Supporting Information Tables S4–S6), suggesting a  
268 possible causal relationship.

## 269 Discussion

270 Our novel modeling framework allows us to study the interplay between photosynthetic plant  
271 performance and resource investment on the molecular level. Comparisons of model predictions with  
272 phenotypic and molecular data reveal that  $C_4$  plants have low phenotypic plasticity in terms of resource  
273 allocation. This limited phenotypic plasticity may be explained by the large amount of nitrogen that needs  
274 to be re-allocated by  $C_4$  plants to optimally adapt to a given growth environment (Supporting Information  
275 Table S5). The lack of phenotypic plasticity allowed us to make quantitative predictions for the  
276 environments that dominated recent evolution of  $C_4$  photosynthesis in *Flaveria*. Previously, environments  
277 relevant for  $C_4$  photosynthesis evolution have been inferred—mostly qualitatively—based on  $C_3$ - $C_4$  habitat  
278 comparisons (Powell, 1978; Sage, 2004; McKown *et al.*, 2005) and geophysiological considerations  
279 (Christin *et al.*, 2011). Our results are consistent with and refine these earlier estimates.

280

281 In contrast to our findings for  $C_4$  and  $C_4$ -like plants, the performance of the evolutionary and the growth  
282 scenario models is similar for  $C_3$  and  $C_3$ - $C_4$  intermediate *Flaveria* species (Table 1; Figs. 2 and 3; Supporting  
283 Information Figs. S2–S5). It is conceivable that the lack of superior performance for the evolutionary  
284 scenario in  $C_3$  *Flaveria* species is not a result of higher phenotypic plasticity in these plants, but is due to  
285 an inappropriate parameterization of the evolutionary scenario. The environment most relevant for the  
286 recent evolution of  $C_3$  *Flaveria* may be different from the environment used in the simulations, which was  
287 chosen based on its relevance for the  $C_4$  lineages. To explore this possibility, we simulated a wide range  
288 of alternative environments, testing if resource allocation optimized for any of these leads to significantly  
289 improved model predictions for the data from Vogan and Sage (2012) for  $C_3$  plants (Supporting  
290 Information Figs. S6 and S7). However, none of the environments tested led to a significant improvement.  
291 This result is in agreement with habitat studies that show that niches of  $C_3$  and  $C_4$  *Flaveria* species overlap  
292 (Powell, 1978). A more likely explanation for the similar performance of evolutionary and growth scenario  
293 models in  $C_3$  plants could lie in the small amount of re-allocation  $C_3$  plants require to transfer adaptively  
294 between environments (Supporting Information Tables S4–S6). Our results thus suggest that  $C_3$  (but not

295 C<sub>4</sub>) plants are phenotypically plastic enough to show some degree of adaptation towards current,  
296 postindustrial conditions.

297

298 Given the complexity of our physiological model, we needed to make a number of assumptions. We  
299 addressed uncertainties in model parameters through a sensitivity analysis, showing that our conclusions  
300 are robust against variation in these parameters (Supporting Information Fig. S1). Furthermore, our  
301 predictions assume that nitrogen availability in the evolutionary scenario is identical to current nitrogen  
302 availability.

303

304 Even though we find that the evolutionary scenario leads to superior predictions of physiological  
305 responses in C<sub>4</sub> plants when compared to the growth scenario, the PEPC activity predicted to be optimal  
306 in the evolutionary scenario is approximately 55% lower than experimentally observed data (Fig. 4). This  
307 discrepancy might in part be explained by the assumption of a fixed average daytime temperature in the  
308 simulations. Temperature variation strongly affects the PEPC activity; lower temperatures in the morning  
309 and evening may require higher PEPC activity than assumed in the simulations. Although predictions for  
310 total nitrogen investment into the thylakoids based on the evolutionary scenario are highly consistent  
311 with the measurements, the model overestimates the amount of cytochrome f by a factor of 2 (1.65  $\mu\text{mol}$   
312  $\text{m}^{-2}$  instead of the measured 0.87  $\mu\text{mol m}^{-2}$  for plants grown at 25°C, 1.43  $\mu\text{mol m}^{-2}$  instead of 0.81  $\mu\text{mol}$   
313  $\text{m}^{-2}$  at 35°C). However, the error of the measurements is uncertain, as no replicate measurements were  
314 performed for this parameter (Dwyer *et al.*, 2007). Discrepancies between model predictions and  
315 observations may also be in part due to error propagation from modeled amounts of chlorophyll and the  
316 photosystems. In each simulation, we optimized resource allocation for an environment that represents  
317 a static approximation to the dynamic environment a plant is facing. As diurnal and annual variations  
318 (which are no focus of this work) potentially show short-term trade-offs (Mori *et al.*, 2017; Reimers *et al.*,  
319 2017), these might lead to a discrepancy between modeled and real evolutionary scenario. In particular,  
320 the difference between periodic and fluctuating conditions of the natural ancestral habitat on one hand,  
321 and the stable experimental growth conditions in audited growth chambers and the statically modeled  
322 evolutionary scenario on the other hand might have a strong effect.

323

324 In summary, we developed a general model of the complex photosynthetic apparatus, its resource  
325 requirements, and its interactions with environmental conditions. The presented modeling pipeline allows  
326 us to determine the extent of phenotypic plasticity and the relevance of different environmental

327 conditions for photosynthetic organisms using C<sub>3</sub>, C<sub>3</sub>-C<sub>4</sub> intermediate, and C<sub>4</sub> metabolism. Applied to the  
328 physiological data from *Flaveria*, our work points to a strongly constrained phenotypic plasticity of C<sub>4</sub>  
329 plants towards all considered environmental factors. This allows us to infer unique selective environments  
330 from plant performance and resource allocation data. More generally, our model provides a powerful tool  
331 to analyze the resource allocation of photosynthetic organisms and its dependence on environmental  
332 factors, allowing estimates for physiological and molecular parameters for which measurements are  
333 currently infeasible or impractical. This may prove to be of particular utility for systematically assessing  
334 the likely performance of crops in environments distinct from their natural habitats and for suggesting  
335 engineering targets in cases of limited phenotypic plasticity.

336

## 337 Description

### 338 *Model overview*

339 The nitrogen-dependent light- and enzyme-limited model allows us to calculate the  
340 environment-dependent net steady-state CO<sub>2</sub> assimilation rate ( $A$ ) of C<sub>3</sub>, C<sub>4</sub>, and all C<sub>3</sub>-C<sub>4</sub> intermediate  
341 photosynthetic types. The model inputs are parameters defining the photosynthetic type and species-  
342 specific, invariable biochemical properties of the leaf to be modeled. Additionally, the input parameters  
343 comprise the following environmental factors: light intensity, leaf nitrogen level, temperature, and CO<sub>2</sub>  
344 and O<sub>2</sub> mesophyll partial pressures. We simulate a plant that is adapted to the input environment with  
345 respect to photosynthetic nitrogen and energy allocation. To this end, the nitrogen and energy allocation  
346 pattern that maximizes the net steady-state CO<sub>2</sub> assimilation rate ( $A$ ) is calculated via optimization, subject  
347 to the environmental and species-specific input parameters.

### 348 *Environmental factors and evolutionary parameters*

349 We specify the environment in terms of the following factors: light intensity, leaf nitrogen level,  
350 temperature, and CO<sub>2</sub> and O<sub>2</sub> mesophyll partial pressures. The photosynthetic type is defined by six  
351 parameters: the Rubisco distribution between mesophyll and bundle sheath cells ( $\beta$ ); the Rubisco kinetics,  
352 (specified through a single parameter,  $k_{ccat}$  [ $\mu\text{mol m}^{-2} \text{s}^{-1}$ ], due to the known trade-off relationships  
353 between the kinetic parameters (Savir *et al.*, 2010)); the maximal C<sub>4</sub> cycle activity ( $V_{pmax}$ , [ $\mu\text{mol m}^{-2} \text{s}^{-1}$ ]);  
354 the fraction of glycine decarboxylated by the glycine decarboxylase complex in the bundle sheath cell that  
355 is derived from oxygenation by Rubisco in the mesophyll cell ( $\xi$ ); the Michaelis constant of PEPC for  
356 bicarbonate ( $K_p$ , [ $\mu\text{bar}$ ]), and the bundle sheath cell conductance ( $g_s$ , [ $\mu\text{mol m}^{-2} \text{s}^{-1}$ ]) (see Heckmann *et al.*

357 (2013) for details). The values for the parameters are taken from the literature (see Supporting  
358 Information for details).

### 359 *Nitrogen allocation*

360 To calculate the CO<sub>2</sub> assimilation rate, we focus on the photosynthetic nitrogen pool ( $N_{ps}$ , [ $\mu\text{mol m}^{-2}$ ]). In  
361 our model,  $N_{ps}$  can be allocated across the following major pools of leaf photosynthetic nitrogen: the main  
362 enzyme of the Calvin-Benson cycle ( $n_{E_{tot}}$ ), Rubisco; the main enzymes of the C<sub>4</sub> cycle ( $n_{C_4}$ ), PEPC and PPDK;  
363 and the thylakoids ( $n_{J_{max}}$ ), which include the electron transport chains.  $N_{ps}$  is calculated as a fraction of  
364 total leaf nitrogen ( $N_t$ , [ $\mu\text{mol m}^{-2}$ ]) based on phenomenological observations according to Eqn 1, which  
365 comprises measured values for the investment into Rubisco, 12%, and the investment into the thylakoids  
366 ( $n_{fit}$ , [fraction]) of C<sub>3</sub> plants (Vogan & Sage, 2011; Vogan & Sage, 2012).  $n_{fit}$  represents a fit of the proportion  
367 of nitrogen invested into the thylakoids as a function of  $N_t$ , based on the data of Vogan and Sage (2011).

$$368 \quad N_{ps} = (0.12 + n_{fit}) \cdot N_t \quad (1)$$

369 with

$$370 \quad n_{fit} = \left( \frac{50.38 - 0.270 \cdot N_t \cdot 10^{-3} + 0.0005035 \cdot (N_t \cdot 10^{-3})^2}{100} \right)$$

371 We assume a nitrogen investment into the photorespiratory enzymes of 13.8%, as suggested by Zhu *et al.*  
372 (2007) for a ‘typical’ C<sub>3</sub> plant. To account for the reduced enzyme requirements of the photorespiratory  
373 cycle, we assume that  $N_{ps}$  increases by 10% in plants that show sufficient C<sub>4</sub> cycle activity; in our analyses,  
374 this applies to the C<sub>3</sub>-C<sub>4</sub> intermediate, C<sub>4</sub>-like, and C<sub>4</sub> species.

### 375 Nitrogen allocated to Rubisco

376 We only consider the nitrogen requirements of Rubisco in the Calvin-Benson cycle, as it accounts for the  
377 major nitrogen costs of this cycle (Evans & Seemann, 1989). The amount of catalytic sites of Rubisco ( $E_{tot}$ ,  
378 [ $\mu\text{mol m}^{-2}$ ]) is calculated from the invested nitrogen by Eqn 2, where  $n_{E_{tot}}$  represents the fraction of  $N_{ps}$   
379 invested into Rubisco:

$$380 \quad E_{tot} = \frac{n_{E_{tot}} \cdot N_{ps} \cdot 8}{11.4 \cdot 550} \quad (2)$$

381 The parameters of this relationship are taken from Harrison *et al.* (2009).

382

### 383 Nitrogen allocated to enzymes of the C<sub>4</sub> cycle

384 The nitrogen cost of C<sub>4</sub> cycle enzymes is calculated from data on enzyme kinetics. The nitrogen  
385 requirements of the C<sub>4</sub> cycle consider co-limitation of PEPC and PPDK, whose molecular weight (MW) and  
386  $k_{cat}$  are used to calculate the maximal rate of C<sub>4</sub> cycle activity (Evans & von Caemmerer, 2000; Wang *et al.*,

387 2014). Eqn 3 represents the relationship between  $V_{pmax}$  and nitrogen investment into the  $C_4$  enzymes  
 388 ( $n_{C4}N_{ps}$ ).  $MW^*$  represents the nitrogen requirement of a catalytic site, assuming the nitrogen content is  
 389 16% (Makino *et al.*, 2003). Indices declare the considered enzyme.

$$390 \quad V_{pmax} = \frac{n_{C4} \cdot N_{ps}}{\left(\frac{MW^*_{PPDK}}{kcat_{PPDK}}\right) + \left(\frac{MW^*_{PEPC}}{kcat_{PEPC}}\right)} \quad (3)$$

391 Nitrogen and the maximal electron transport rate

392 Nitrogen invested into the thylakoids ( $N_{thy} = N_t n_{thy}$ , [ $\mu\text{mol m}^{-2}$ ]) is related to the maximal electron transport  
 393 rate ( $J_{max}$ , [ $\mu\text{mol m}^{-2} \text{s}^{-1}$ ]) via the amount of cytochrome f (cyt, [ $\text{mmol/mol Chl}$ ]) and by considering  
 394 photosystems I and II (PSI and PSII, [ $\text{mmol/mol Chl}$ ]) as well as the light harvesting complexes (LHC,  
 395 [ $\text{mmol/mol Chl}$ ]). We use data from Ghannoum *et al.* (2005) for abundances of PSI and PSII to include  
 396 phenomenological stoichiometry rules between LHC and the components of the electron transport chain  
 397 (Eqns 4–8) and to relate  $N_{thy}$  to the amount of cyt (Eqns 9–11). We assume that the chlorophyll content is  
 398 shared between PSI, PSII, and LHC (Eqns 7 and 8). To be able to consider LET and CET, these complexes  
 399 are split according to the proportion of LET ( $p$ ) and CET ( $1 - p$ ). Indices represent the considered pathway.

$$400 \quad PSI_{LET} = 2 \cdot p \quad (4)$$

$$401 \quad PSI_{CET} = 2 \cdot (1 - p) \quad (5)$$

$$402 \quad PSII = 2.5 \quad (6)$$

$$403 \quad LHC_{LET} = \frac{1000 \cdot p - PSII \cdot 60 - PSI_{LET} \cdot 184}{13} \quad (7)$$

$$404 \quad LHC_{CET} = \frac{1000 \cdot (1-p) - PSI_{CET} \cdot 184}{13} \quad (8)$$

405

406 For the LET,  $J_{max}$  is related to  $N_{thy}$  as described in Eqns 9–12.  $cyt_{Jmax}$  describes the relation of cyt to  $J_{max}$  and  
 407 was measured by Niinemets and Tenhunen (1997), who determined 156 ( $\text{mmol e}^-$ )/( $\text{mmol cyt s}$ ) across  
 408 various  $C_3$  species. Assuming 95% of LET in  $C_3$  plants, this leads to a capacity of 172 ( $\text{mmol e}^-$ )/( $\text{mmol cyt}$   
 409  $\text{s}$ ) for  $cyt_{Jmax}$ .

$$410 \quad N_{thy_{LET}} = \frac{n_{Jmax} \cdot N_{ps} \cdot p}{Chl} \quad (9)$$

$$411 \quad N_{LH_{LET}} = PSII \cdot 83.3 \cdot 0.06 + PSI_{LET} \cdot 32.8 \cdot 0.184 + LHC_{LET} \cdot 26 \cdot 0.013 \quad (10)$$

$$412 \quad cyt_{LET} = \frac{1}{8.85} (N_{thy_{LET}} - N_{LH_{LET}}) \quad (11)$$

$$413 \quad Jmax_{LET} = \max\left(0, \frac{cyt_{LET} \cdot Chl \cdot cyt_{Jmax}}{1000}\right) \quad (12)$$

414

415 Chlorophyll content ( $Chl$ , [ $\mu\text{mol m}^{-2}$ ]) is calculated based on an empirical factor (Vogan & Sage, 2012) that  
416 relates the amount of nitrogen invested into thylakoids ( $n_{fit} N_t$ , Eqn 1) to the amount of chlorophyll in  $C_3$   
417 plants:

$$418 \quad Chl = n_{fit} \cdot N_t \cdot 0.0158887 \quad (13)$$

419 The response of chlorophyll content to leaf nitrogen does not differ significantly between different  
420 photosynthetic types in *Flaveria* (Vogan & Sage, 2011).

421  
422 The derivation for the CET is analogous to the case of the LET (Eqns 14–17); additionally, the factor  $Jmax_{CL}$   
423 is required, which describes the scaling of  $J_{max}$  with  $cyt$  for the CET:

$$424 \quad N_{thy_{CET}} = \frac{n_{Jmax} \cdot N_{ps} \cdot (1-p)}{Chl} \quad (14)$$

$$425 \quad N_{LH_{CET}} = PSI_{CET} \cdot 32.8 \cdot 0.184 + LHC_{CET} \cdot 26 \cdot 0.013 \quad (15)$$

$$426 \quad cyt_{CET} = \frac{1}{8.85} (N_{thy_{CET}} - N_{LH_{CET}}) \quad (16)$$

$$427 \quad Jmax_{CET} = \max\left(0, \frac{cyt_{CET} \cdot Chl \cdot cyt_{Jmax} \cdot Jmax_{CL}}{1000}\right) \quad (17)$$

428

## 429 Optimization procedure

430 To find the maximal  $\text{CO}_2$  assimilation rate under the given environmental, physiological, and biochemical  
431 constraints, we optimize the allocation of photosynthetic nitrogen (assumed to depend only on total leaf  
432 nitrogen) into Rubisco,  $C_4$  cycle, LET, and CET through an augmented Lagrangian approach. The  
433 optimization is constrained to make sure that the results are biologically realistic, e.g.,  $C_3$  species were not  
434 able to invest nitrogen into the  $C_4$  cycle (see Supporting Information for additional details).

435

436 The model and its optimization were implemented in the R environment (R Core Team, 2017), using the  
437 `auglag`-function of the package ‘`nloptr`’ (Johnson, see Supporting Information for details). The  
438 optimization algorithm can use various local solvers; we chose a derivative-free solver, ‘`COBYLA`’. We  
439 adapted the parameters of the `auglag`-function as follows: (1) `xtol_rel`= $1 \times 10^{-100}$ , i.e., we stop the  
440 optimization when all parameters changed by a proportion  $< 1 \times 10^{-100}$  in the last iteration; (2) `localtol`, the  
441 tolerance applied in the selected local solver, is set to  $1 \times 10^{-100}$ ; and (3) `maxeval`, the maximal number of  
442 optimization iterations, is set to  $5 \times 10^3$ . To ensure robust retrieval of the global optimum, we perform a  
443 large number of optimizations starting from a wide range of initial values (see Supporting Information for  
444 details). The successful run resulting in the maximal  $\text{CO}_2$  assimilation rate is used.

445

446 *Modeling the effect of light*

447 The relationship of the electron transport rate ( $J_t$ , [ $\mu\text{mol m}^{-2} \text{s}^{-1}$ ]) and the absorbed light of a certain  
448 irradiance ( $I$ , [ $\mu\text{mol m}^{-2} \text{s}^{-1}$ ]) is presented in Eqns 18–20.  $I$  is related to  $J_t$  by a widely accepted empirical  
449 hyperbolic function (Eqn 18), (von Caemmerer, 2000; Bernacchi *et al.*, 2003) that includes the following  
450 parameters: (1)  $J_{max}$ , the maximum electron transport rate; (2)  $\theta$ , the convexity of the transition between  
451 the initial slope and the plateau of the hyperbola; (3)  $\alpha$ , the leaf absorptance; (4)  $f$ , a correction factor  
452 accounting for the spectral quality of the light; and (5)  $p$ , the fraction of absorbed quanta that reaches PSI  
453 and PSII of LET (with  $(1 - p)$  reaching the CET).  $I_{abso}$  is set to  $I_{LET}$  and  $I_{CET}$  dependent on the considered path  
454 of electron transport. The fraction of irradiance that is absorbed by the LET is shared equally between PSI  
455 and PSII (resulting in the factor 0.5 in Eqn 19), while the fraction of irradiance that is absorbed by the CET  
456 is assumed to reach PSI in full.

457 
$$J_t = \frac{I_{abso} + J_{max} - \sqrt{(I_{abso} + J_{max})^2 - 4 \theta I_{abso} J_{max}}}{2\theta} \quad (18)$$

458 
$$I_{LET} = I \cdot \alpha \cdot (1 - f) \cdot p \cdot 0.5 \quad (19)$$

459 
$$I_{CET} = I \cdot \alpha \cdot (1 - f) \cdot (1 - p) \quad (20)$$

460

461 In our model it is assumed that the electron transport chain is the only source of ATP and NADPH and that  
462 both are used exclusively for  $\text{CO}_2$  fixation (von Caemmerer, 2000). As NADPH production results from LET,  
463 the amount of electrons is calculated using Eqns 18 and 19. The amount of electrons utilized for ATP  
464 production depends on both LET and CET (see below). There are multiple pathways of CET (Kramer &  
465 Evans, 2011); the model considers those pathways with an active Q-cycle and a ratio of two protons per  
466 electron. Note that Rubisco is assumed to be fully activated, independent of the irradiance (von  
467 Caemmerer, 2000).

468

469 The available energy needs to be partitioned between five pools: (1) the Calvin-Benson cycle (CBB) in the  
470 mesophyll; (2) the CBB in the bundle sheath; (3) the photorespiratory pathway (PR) in the mesophyll; (4)  
471 the PR in the bundle sheath cell; and (5) the  $\text{C}_4$  pathway. This means that the available energy is calculated  
472 in total and then partitioned (Kanai & Edwards, 1999) into  $J_{mp}$ ,  $J_{mc}$  and  $J_s$ , the fractions invested into the  
473  $\text{C}_4$  cycle, the CBB and the PR in the mesophyll, and the CBB and the PR in the bundle sheath cell,  
474 respectively. During optimization, the activity of each process is constrained by its allocated energy pool,  
475 *i.e.*, the energy allocation equals the relative energy allocation of the processes (see Supporting  
476 Information Method S1 for details).



477

478 The number of electrons transported to generate one molecule of ATP is unknown; for a discussion, see,  
479 e.g., Amthor (2010). We address these uncertainties by a factor that represents the ratio of electron  
480 transported per ATP in LET, which we set to  $e_{ATP} = 4/3$  in this work. In *Flaveria*, this ratio is supported by  
481 Siebke *et al.* (1997). The ATP and the NADPH requirements of the CBB, the PR, and the C<sub>4</sub> cycle are based  
482 on the work of von Caemmerer (2000, see Supporting Information for equations). The energy  
483 requirements of the C<sub>4</sub> cycle are adequate for the C<sub>4</sub>-subtypes that utilize NAD-malic enzyme or  
484 NADP-malic enzyme, whose ATP demand can be assumed to be equal. For the C<sub>4</sub>-subtype that utilizes PEP  
485 carboxykinase, the energetic costs are different and currently unclear (Kanai & Edwards, 1999; von  
486 Caemmerer, 2000).

487

#### 488 *CO<sub>2</sub> assimilation rate*

489 A limitation in the production of both ATP and NADPH arises under light-limited conditions (von  
490 Caemmerer, 2000). The ATP-limited CO<sub>2</sub> assimilation rate ( $A_j^{ATP}$ ) is calculated according to the  
491 light-limiting model of von Caemmerer (2000) (see Supporting Information for equations). The NADPH  
492 limitation is calculated analogously to the ATP-limited scenario ( $A_j^{NADPH}$ , see Supporting Information).  
493 The light-limited CO<sub>2</sub> assimilation rate is then:

$$494 \quad A_j = \min(A_j^{ATP}, A_j^{NADPH}) \quad (24)$$

495

496 The model for the CO<sub>2</sub> assimilation rate when the electron transport rate is not limiting ( $A_c$ ) is taken from  
497 Heckmann *et al.* (2013) and extended by a parameter representing the fraction of PSII activity in the  
498 bundle sheath cells, which affects O<sub>2</sub> evolution. This parameter is set to  $\rho$ . In the whole model, each  
499 limitation is considered independently; the minimal CO<sub>2</sub> assimilation rate determines the limiting process:

$$500 \quad A = \min(A_j, A_c) \quad (25)$$

501

#### 502 *Temperature-dependent model*

503 Temperature affects the CO<sub>2</sub> assimilation rate by changing the maximal activity of the C<sub>4</sub> cycle, the  
504 carboxylation rate of Rubisco, and the electron transport rate. Temperature also affects the specificity of  
505 Rubisco as well as the Michaelis constants of Rubisco and PEPC. We model the temperature response by  
506 an extended Arrhenius function that describes two counteracting effects: rate increases with increasing  
507 temperature and enzyme inactivation through thermal instability (Massad *et al.*, 2007). We use

508 parameters taken from literature or fitted to available data (see Supporting Information for the equation  
509 and a full list of parameters and their sources).

510

### 511 *Data used in the analyses*

512 As the raw data of Vogan and Sage (2012) was not available, we extracted it from the corresponding  
513 figures using the Graph Grabber software provided by Quintessa Limited (Version 1.5.5). The measured  
514 curves consider the CO<sub>2</sub> assimilation rate per intercellular CO<sub>2</sub> concentration ( $C_i$ ). We assume that the  
515 mesophyll CO<sub>2</sub> level is 85% of the  $C_i$ .

516

517 For the detailed analysis of the C<sub>4</sub> plants (Fig. 4), we used data published by Dwyer *et al.* (2007) for the  
518 CO<sub>2</sub> assimilation rate at 25°C and 35°C, Rubisco catalytic sites, the PEPC activity, and the nitrogen  
519 investment into the thylakoids. As PEPC activity in *Flaveria* does not serve as a proxy for C<sub>4</sub> cycle activity  
520 above values of around 130 μmol m<sup>-2</sup> s<sup>-1</sup> (Heckmann *et al.*, 2013), the maximal PEPC activity in C<sub>4</sub> plants is  
521 set to 130 μmol m<sup>-2</sup> s<sup>-1</sup>.

522

### 523 Required nitrogen re-allocation ( $\delta_n$ )

524 Required nitrogen re-allocation ( $\delta_n$ , [fraction]) is defined as the total fraction of nitrogen that needs to be  
525 re-allocated between photosynthetic pools to optimally adjust photosynthesis from the evolutionary  
526 scenario ( $n_{Etot}^{evo}$ ,  $n_{C4}^{evo}$ ,  $n_{Jmax}^{evo}$ ) to a given growth environment ( $n_{Etot}^{growth}$ ,  $n_{C4}^{growth}$ ,  $n_{Jmax}^{growth}$ ):

$$527 \quad \delta_n = \sum_{i \in \{Etot, C4, Jmax\}} |n_i^{evo} - n_i^{growth}| \quad (26)$$

528

### 529 *Statistical information*

530 The differences between adaptation scenarios are tested with the Wilcoxon rank sum test. Due to  
531 computational limitations, only a limited number of leaf nitrogen levels can be used to calculate the  
532 resource allocation for the data set of Vogan and Sage (2011) (Fig. 3). We considered 16 leaf nitrogen  
533 levels for the calculation of the resource allocation and CO<sub>2</sub> assimilation rates. We inferred the CO<sub>2</sub>  
534 assimilation rates required for the remaining leaf nitrogen levels from linear interpolation between the  
535 two closest leaf nitrogen levels. For the statistical analysis, the data of the modeled species, *F. pringlei*  
536 (C<sub>3</sub>), *F. floridana* (C<sub>3</sub>-C<sub>4</sub>), *F. palmeri* (C<sub>4</sub>-like), and *F. bidentis* (C<sub>4</sub>), was considered. All statistical analyses  
537 were conducted in R (R Core Team, 2017).

538

539 The difference of  $\delta_n$  for various photosynthetic types was tested by a sign test, applied to the data of  
540 Vogan and Sage (2011) (Supporting Information Table S5).

541

## 542 Acknowledgements

543 We thank Prof. Rowan F. Sage and Prof. Susanne von Caemmerer for providing raw data from their  
544 publications. We further acknowledge financial support by the Deutsche Forschungsgemeinschaft (grants  
545 IRTG 1525 to DH, EXC 1028 to MJL and ES, CRC 680 and CRC 1310 to MJL). We would like to thank Bernhard  
546 O. Palsson and his group for hosting ES and for valuable discussions.

## 547 Author Contributions

548 ES, MJL, and DH designed the research, interpreted the results, and wrote the paper. ES developed and  
549 implemented the model for nitrogen allocation and light reactions, and implemented the optimization  
550 procedure. DH developed and implemented the model for temperature responses. ES and DH conducted  
551 simulations and data analysis.

## 552 References

- 553 **Amthor JS. 2010.** From sunlight to phytomass: on the potential efficiency of converting solar radiation to  
554 phyto-energy. *New Phytologist* **188**(4): 939-959.
- 555 **Atkinson D. 1969.** Limitation of metabolite concentrations and the conservation of solvent capacity in the  
556 living cell. *Current topics in cellular regulation* **1**: 29-43.
- 557 **Baudouin-Cornu P, Surdin-Kerjan Y, Marliere P, Thomas D. 2001.** Molecular evolution of protein atomic  
558 composition. *Science* **293**(5528): 297-300.
- 559 **Beg QK, Vazquez A, Ernst J, de Menezes MA, Bar-Joseph Z, Barabasi AL, Oltvai ZN. 2007.** Intracellular  
560 crowding defines the mode and sequence of substrate uptake by Escherichia coli and constrains  
561 its metabolic activity. *Proceedings of the National Academy of Sciences of the United States of*  
562 *America* **104**(31): 12663-12668.
- 563 **Bernacchi CJ, Pimentel C, Long SP. 2003.** In vivo temperature response functions of parameters required  
564 to model RuBP-limited photosynthesis. *Plant Cell and Environment* **26**(9): 1419-1430.
- 565 **Berry JA, Farquhar GD 1978.** The CO<sub>2</sub> concentrating function of C<sub>4</sub> photosynthesis: a biochemical model.  
566 *Proceedings of the Fourth International Congress on Photosynthesis. Biochemical Society, London.*  
567 119-131.
- 568 **Christin PA, Sage TL, Edwards EJ, Ogburn RM, Khoshravesh R, Sage RF. 2011.** Complex Evolutionary  
569 Transitions and the Significance of C<sub>3</sub>-C<sub>4</sub> Intermediate Forms of Photosynthesis in Molluginaceae.  
570 *Evolution* **65**(3): 643-660.
- 571 **de Oliveira Dal'Molin CG, Quek LE, Palfreyman RW, Brumbley SM, Nielsen LK. 2010.** AraGEM, a genome-  
572 scale reconstruction of the primary metabolic network in Arabidopsis. *Plant Physiology* **152**: 579.
- 573 **Dourado H, Maurino VG, Lercher MJ. 2017.** Enzymes And Substrates Are Balanced At Minimal Combined  
574 Mass Concentration In Vivo. *bioRxiv*.

- 575 **Dwyer SA, Ghannoum O, Nicotra A, Von Caemmerer S. 2007.** High temperature acclimation of C<sub>4</sub>  
576 photosynthesis is linked to changes in photosynthetic biochemistry. *Plant Cell and Environment*  
577 **30**(1): 53-66.
- 578 **Ellis RJ. 1979.** Most Abundant Protein in the World. *Trends in Biochemical Sciences* **4**(11): 241-244.
- 579 **Evans JR, Seemann JR. 1989.** The allocation of protein nitrogen in the photosynthetic apparatus: costs,  
580 consequences, and control. *Photosynthesis*: 183-205.
- 581 **Evans JR, von Caemmerer S 2000.** Would C<sub>4</sub> rice produce more biomass than C<sub>3</sub> rice? In: Sheehy JE,  
582 Mitchell PL, Hardy B eds. *Redesigning rice photosynthesis to increase yield*: Elsevier, 53-71.
- 583 **Farquhar GD, Caemmerer S, Berry JA. 1980.** A biochemical model of photosynthetic CO<sub>2</sub> assimilation in  
584 leaves of C<sub>3</sub> species. *Planta* **149**: 78-90.
- 585 **Friend AD. 1991.** Use of a Model of Photosynthesis and Leaf Microenvironment to Predict Optimal  
586 Stomatal Conductance and Leaf Nitrogen Partitioning. *Plant Cell and Environment* **14**(9): 895-905.
- 587 **Gerhart LM, Ward JK. 2010.** Plant responses to low CO<sub>2</sub> of the past. *New Phytologist* **188**(3): 674-695.
- 588 **Ghannoum O, Evans JR, Chow WS, Andrews TJ, Conroy JP, von Caemmerer S. 2005.** Faster rubisco is the  
589 key to superior nitrogen-use efficiency in NADP-malic enzyme relative to NAD-malic enzyme C<sub>4</sub>  
590 grasses. *Plant Physiology* **137**(2): 638-650.
- 591 **Harrison MT, Edwards EJ, Farquhar GD, Nicotra AB, Evans JR. 2009.** Nitrogen in cell walls of  
592 sclerophyllous leaves accounts for little of the variation in photosynthetic nitrogen-use efficiency.  
593 *Plant Cell and Environment* **32**(3): 259-270.
- 594 **Heckmann D, Schulze S, Denton A, Gowik U, Westhoff P, Weber A PM, Lercher Martin J. 2013.** Predicting  
595 C<sub>4</sub> Photosynthesis Evolution: Modular, Individually Adaptive Steps on a Mount Fuji Fitness  
596 Landscape. *Cell* **153**(7): 1579-1588.
- 597 **Ibarra RU, Edwards JS, Palsson BO. 2002.** Escherichia coli K-12 undergoes adaptive evolution to achieve  
598 in silico predicted optimal growth. *Nature* **420**(6912): 186-189.
- 599 **Johnson SG** The NLOpt nonlinear-optimization package.
- 600 **Kanai R, Edwards GE 1999.** The biochemistry of C<sub>4</sub> photosynthesis. In: Sage RF, Monson RK eds. *C<sub>4</sub> plant*  
601 *biology*: Academic press, Toronto, ON, Canada, 49-87.
- 602 **Kramer DM, Evans JR. 2011.** The Importance of Energy Balance in Improving Photosynthetic Productivity.  
603 *Plant Physiology* **155**(1): 70-78.
- 604 **Maire V, Martre P, Kattge J, Gastal F, Esser G, Fontaine S, Soussana JF. 2012.** The Coordination of Leaf  
605 Photosynthesis Links C and N Fluxes in C<sub>3</sub> Plant Species. *PLoS ONE* **7**(6).
- 606 **Makino A, Sakuma H, Sudo E, Mae T. 2003.** Differences between maize and rice in N-use efficiency for  
607 photosynthesis and protein allocation. *Plant and Cell Physiology* **44**(9): 952-956.
- 608 **Malhi SS, Grant CA, Johnston AM, Gill KS. 2001.** Nitrogen fertilization management for no-till cereal  
609 production in the Canadian Great Plains: a review. *Soil & Tillage Research* **60**(3-4): 101-122.
- 610 **Mallmann J, Heckmann D, Bräutigam A, Lercher MJ, Weber AP, Westhoff P, Gowik U. 2014.** The role of  
611 photorespiration during the evolution of C<sub>4</sub> photosynthesis in the genus *Flaveria*. *eLife*  
612 **10.7554/eLife.02478**.
- 613 **Massad RS, Tuzet A, Bethenod O. 2007.** The effect of temperature on C<sub>4</sub>-type leaf photosynthesis  
614 parameters. *Plant Cell and Environment* **30**(9): 1191-1204.
- 615 **Maurino VG, Peterhansel C. 2010.** Photorespiration: current status and approaches for metabolic  
616 engineering. *Current Opinion in Plant Biology* **13**(3): 249-256.
- 617 **McKown AD, Moncalvo J-M, Dengler NG. 2005.** Phylogeny of *Flaveria* (Asteraceae) and inference of C<sub>4</sub>  
618 photosynthesis evolution. *American Journal of Botany* **92**: 1911-1928.
- 619 **Mori M, Schink S, Erickson DW, Gerland U, Hwa T. 2017.** Quantifying the benefit of a proteome reserve  
620 in fluctuating environments. *Nature Communications* **8**.
- 621 **Munekage YN, Taniguchi YY. 2016.** Promotion of Cyclic Electron Transport Around Photosystem I with  
622 the Development of C<sub>4</sub> Photosynthesis. *Plant and Cell Physiology* **57**(5): 897-903.

- 623 **Niinemets U, Tenhunen JD. 1997.** A model separating leaf structural and physiological effects on carbon  
624 gain along light gradients for the shade-tolerant species *Acer saccharum*. *Plant Cell and*  
625 *Environment* **20**(7): 845-866.
- 626 **Oberhardt MA, Palsson BO, Papin JA. 2009.** Applications of genome-scale metabolic reconstructions.  
627 *Molecular Systems Biology* **5**.
- 628 **Powell AM. 1978.** Systematics of *Flaveria* (Flaveriinae-Asteraceae). *Annals of the Missouri Botanical*  
629 *Garden*: 590-636.
- 630 **R Core Team 2017.** R: A Language and Environment for Statistical Computing: R Foundation for Statistical  
631 Computing.
- 632 **Reimers AM, Knoop H, Bockmayr A, Steuer R. 2017.** Cellular trade-offs and optimal resource allocation  
633 during cyanobacterial diurnal growth. *Proc Natl Acad Sci U S A*.
- 634 **Sage RF. 2004.** The evolution of C<sub>4</sub> photosynthesis. *New Phytologist* **161**: 341-370.
- 635 **Sage RF, Cowling SA. 1999.** Implications of stress in low CO<sub>2</sub> atmospheres of the past: are today's plants  
636 too conservative for a high CO<sub>2</sub> world. *Carbon dioxide and environmental stress*: 289-308.
- 637 **Sage RF, McKown AD. 2006.** Is C<sub>4</sub> photosynthesis less phenotypically plastic than C<sub>3</sub> photosynthesis?  
638 *Journal of Experimental Botany* **57**(2): 303-317.
- 639 **Savir Y, Noor E, Milo R, Tlustý T. 2010.** Cross-species analysis traces adaptation of Rubisco toward  
640 optimality in a low-dimensional landscape. *Proceedings of the National Academy of Sciences*  
641 **107**(8): 3475-3480.
- 642 **Siebke K, vonCaemmerer S, Badger M, Furbank RT. 1997.** Expressing an RbcS antisense gene in transgenic  
643 *Flaveria bidentis* leads to an increased quantum requirement for CO<sub>2</sub> fixed in photosystems I and  
644 II. *Plant Physiology* **115**(3): 1163-1174.
- 645 **Vance CP. 2001.** Symbiotic nitrogen fixation and phosphorus acquisition. Plant nutrition in a world of  
646 declining renewable resources. *Plant Physiology* **127**(2): 390-397.
- 647 **Vogan PJ, Sage RF. 2011.** Water-use efficiency and nitrogen-use efficiency of C<sub>3</sub>-C<sub>4</sub> intermediate species  
648 of *Flaveria* Juss. (Asteraceae). *Plant, Cell & Environment* **34**: 1415-1430.
- 649 **Vogan PJ, Sage RF. 2012.** Effects of low atmospheric CO<sub>2</sub> and elevated temperature during growth on the  
650 gas exchange responses of C<sub>3</sub>, C<sub>3</sub>-C<sub>4</sub> intermediate, and C<sub>4</sub> species from three evolutionary lineages  
651 of C<sub>4</sub> photosynthesis. *Oecologia* **169**(2): 341-352.
- 652 **von Caemmerer S. 1989.** A model of photosynthetic CO<sub>2</sub> assimilation and carbon-isotope discrimination  
653 in leaves of certain C<sub>3</sub>-C<sub>4</sub> intermediates. *Planta* **178**(4): 463-474.
- 654 **von Caemmerer S. 2000.** *Biochemical models of leaf photosynthesis*. Collingwood, Australia: Csiro  
655 Publishing.
- 656 **Wang Y, Long SP, Zhu XG. 2014.** Elements Required for an Efficient NADP-Malic Enzyme Type C<sub>4</sub>  
657 Photosynthesis. *Plant Physiology* **164**(4): 2231-2246.
- 658 **Zhu X-G, de Sturler E, Long SP. 2007.** Optimizing the distribution of resources between enzymes of carbon  
659 metabolism can dramatically increase photosynthetic rate: a numerical simulation using an  
660 evolutionary algorithm. *Plant Physiol* **145**: 513-526.

661

662

## 663 Figure legend

664 **Table 1** In C<sub>4</sub> and C<sub>4</sub>-like plants, the evolutionary scenario shows significantly smaller residual sum of  
665 squares compared to the growth scenario. The residual sum of squares for the evolutionary and growth

666 scenario, each photosynthetic type, and all measured curves of Vogan and Sage (2011) and Vogan and  
667 Sage (2012) are presented.

668

669 **Figure 2** Model results based on optimality in the evolutionary scenario (solid lines) describe the measured  
670 data (dots  $\pm$  SE) better than the model assuming optimal adaptation to the growth conditions (dashed  
671 lines) for *F. robusta* (C<sub>3</sub>), *F. ramosissima* (C<sub>3</sub>-C<sub>4</sub>), and *F. bidentis* (C<sub>4</sub>) grown at the current CO<sub>2</sub> level (data  
672 from Vogan and Sage (2012)). (a) The net CO<sub>2</sub> assimilation rate as a function of intercellular CO<sub>2</sub>  
673 concentration measured at 30°C. (b) The net CO<sub>2</sub> assimilation rate as a function of temperature.

674

675 **Figure 3** The dependence of the CO<sub>2</sub> assimilation rate on leaf nitrogen levels for various *Flaveria* species  
676 is consistent with model results based on optimality in the evolutionary scenario (solid lines). For C<sub>3</sub>-C<sub>4</sub>  
677 intermediate, C<sub>4</sub>-like, and C<sub>4</sub> these results outperform the ones assuming optimal phenotypic adaptation  
678 to the growth conditions (dashed lines). The modeled species are *F. pringlei* (C<sub>3</sub>), *F. floridana* (C<sub>3</sub>-C<sub>4</sub>),  
679 *F. palmeri* (C<sub>4</sub>-like), and *F. bidentis* (C<sub>4</sub>) (data from Vogan and Sage (2011)).

680

681 **Figure 4** A detailed analysis of resource allocation and physiology in *F. bidentis* (C<sub>4</sub>) shows a good  
682 agreement between experimental data (Dwyer *et al.*, 2007) and model results based on the evolutionary  
683 scenario (orange dots). Alternative model results assuming optimal phenotypic adaptation to the growth  
684 scenario consistently show higher disagreement with the data (purple dots). Values are mean  
685  $\log_2(\text{modeled results}/\text{measured data}) \pm$  SE. (a) Plants grown at 25°C (b) Plants grown at 35°C. A = net CO<sub>2</sub>  
686 assimilation rate; N = nitrogen.

687

688 **Figure 5** Discrepancy between measured and modeled *F. bidentis* data across diverse environments. The  
689 black dot indicates the environment that best explains the experimental data of Dwyer *et al.* (2007). The  
690 deviation between model predictions and measurements ('error') is defined as the mean of the squared  
691 residuals (which are expressed as fractions of experimental means).

692

## 693 Supporting Information

694 Additional supporting information may be found in the online version of this article.

695

696 **Methods S1** Details about the optimization procedure of resource allocation

697 **Methods S2** Equations of the energetic costs  
698 **Methods S3** Equations of the light-limited CO<sub>2</sub> assimilation rate  
699 **Methods S4** Details about the temperature-dependent model  
700 **Methods S5** Sensitivity analysis  
701  
702 **Table S1** *Flaveria* parametrization.  
703 **Table S2** Lower and upper bounds for the model parameters subject to numerical optimization.  
704 **Table S3** The parameters of the temperature-dependent model.  
705 **Table S4** Required nitrogen re-allocation ( $\delta_n$ ) for *F. bidentis* (C<sub>4</sub>) grown at different temperatures.  
706 **Table S5** Required nitrogen re-allocation ( $\delta_n$ ) for different on leaf nitrogen level for various *Flaveria*  
707 species.  
708 **Table S6** Required nitrogen re-allocation ( $\delta_n$ ) for various *Flaveria* species grown at current or low CO<sub>2</sub> level.  
709 **Table S7** The modeled and measured data of chlorophyll and PSII of *F. bidentis* (C<sub>4</sub>).  
710 **Table S8** Distribution parameters used to generate the random parameter sets for the sensitivity.  
711 **Fig. S1** Sensitivity analysis.  
712 **Fig. S2** A-C<sub>i</sub> curve measured at 40°C using plants grown at the current CO<sub>2</sub> level.  
713 **Fig. S3** A-C<sub>i</sub> curve measured at 30°C using plants grown at the low CO<sub>2</sub> level.  
714 **Fig. S4** A-C<sub>i</sub> curve measured at 40°C using plants grown at the low CO<sub>2</sub> level.  
715 **Fig. S5** A-Temperature curve using plants grown at the low CO<sub>2</sub> level  
716 **Fig. S6** Discrepancy between measured and modeled results of *F. robusta* (C<sub>3</sub>) across diverse environments  
717 assuming no phosphate-limitation.  
718 **Fig. S7** Discrepancy between measured and modeled results of *F. robusta* (C<sub>3</sub>) across diverse environments  
719 assuming phosphate-limitation.  
720

721 **Table 1** In C<sub>4</sub> and C<sub>4</sub>-like plants, the evolutionary scenario shows significantly smaller residual sum of  
 722 squares compared to the growth scenario. The residual sum of squares for the evolutionary and growth  
 723 scenario, each photosynthetic type, and all measured curves of Vogan and Sage (2011) and Vogan and  
 724 Sage (2012) are presented.

|                       |                                | C <sub>3</sub> | C <sub>3</sub> -C <sub>4</sub><br>intermediate | C <sub>4</sub> -like | C <sub>4</sub> |
|-----------------------|--------------------------------|----------------|------------------------------------------------|----------------------|----------------|
| Evolutionary scenario | Fig. 2a                        | 58.1           | 77.1                                           |                      | 93.4           |
|                       | Fig. 2b                        | 823.7          | 524.6                                          |                      | 155.6          |
|                       | Fig. 3                         | 549.2          | 1554.3                                         | 1443.5               | 834.9          |
|                       | Supporting Information Fig. S2 | 616.3          | 299.1                                          |                      | 136.9          |
|                       | Supporting Information Fig. S3 | 39.9           | 40.4                                           |                      | 166.0          |
|                       | Supporting Information Fig. S4 | 137.0          | 85.6                                           |                      | 286.4          |
|                       | Supporting Information Fig. S5 | 14.5           | 93.9                                           |                      | 275.5          |
| Growth scenario       | Fig. 2a                        | 602.2          | 238.2                                          |                      | 2454.5         |
|                       | Fig. 2b                        | 755.2          | 306.1                                          |                      | 340.3          |
|                       | Fig. 3                         | 386.5          | 2122.2                                         | 3052.2               | 1873.2         |
|                       | Supporting Information Fig. S2 | 252.7          | 84.9                                           |                      | 433.9          |
|                       | Supporting Information Fig. S3 | 140.84         | 50.7                                           |                      | 436.1          |
|                       | Supporting Information Fig. S4 | 97.8           | 38.8                                           |                      | 460.0          |
|                       | Supporting Information Fig. S5 | 13.4           | 53.9                                           |                      | 142.8          |

725



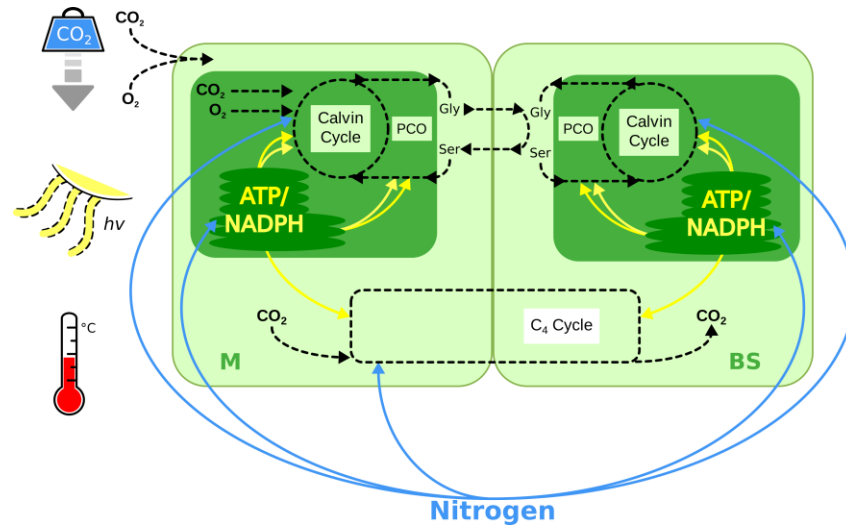

726

727 **Figure 1** An overview of the nitrogen-dependent light- and enzyme-limited model. CO<sub>2</sub> entering the  
728 mesophyll cell (M) can be fixed by Rubisco (C<sub>3</sub> and intermediates) or PEPC (C<sub>4</sub> and intermediates); The C<sub>4</sub>  
729 cycle then shuttles CO<sub>2</sub> fixed by PEPC to the bundle sheath cell (BS) and releases it, allowing it to be re-  
730 fixed by Rubisco. The fixation of O<sub>2</sub> by Rubisco leads to photorespiration (PCO). Blue arrows indicate the  
731 nitrogen allocation and yellow arrows represent the energy allocation considered in the model.

732

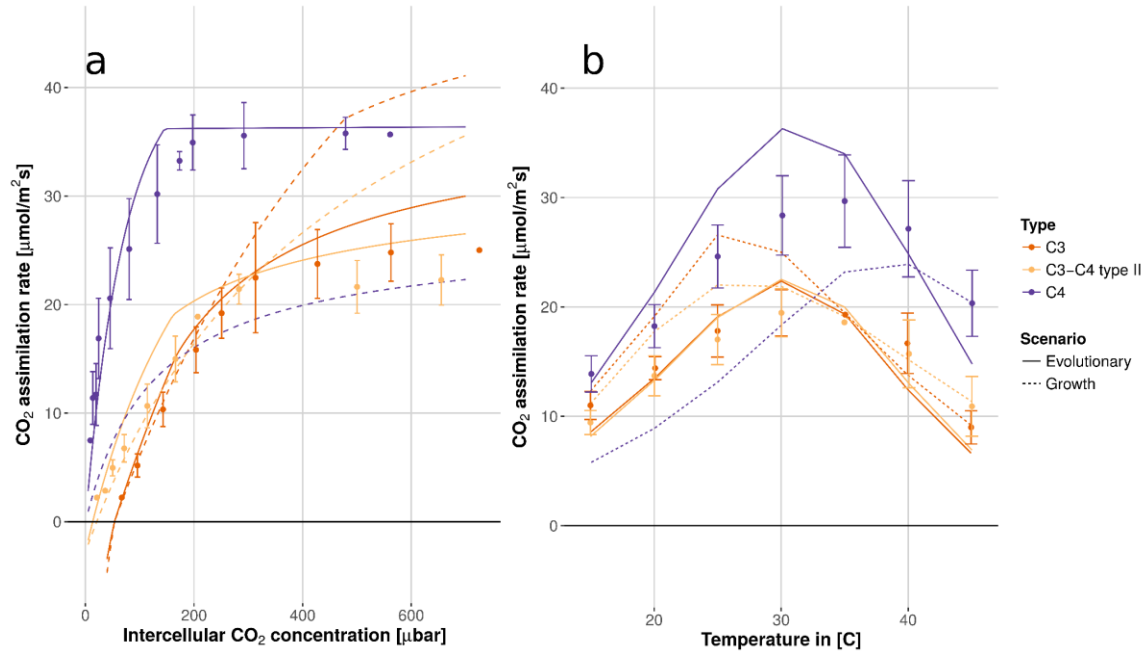

733

734 **Figure 2** Model results based on optimality in the evolutionary scenario (solid lines) describe the measured  
735 data (dots  $\pm$  SE) better than the model assuming optimal adaptation to the growth conditions (dashed  
736 lines) for *F. robusta* (C<sub>3</sub>), *F. ramosissima* (C<sub>3</sub>-C<sub>4</sub> type II), and *F. bidentis* (C<sub>4</sub>) grown at the current CO<sub>2</sub> level (data  
737 from Vogan and Sage (2012)). (a) The net CO<sub>2</sub> assimilation rate as a function of intercellular CO<sub>2</sub>  
738 concentration measured at 30°C. (b) The net CO<sub>2</sub> assimilation rate as a function of temperature.

739

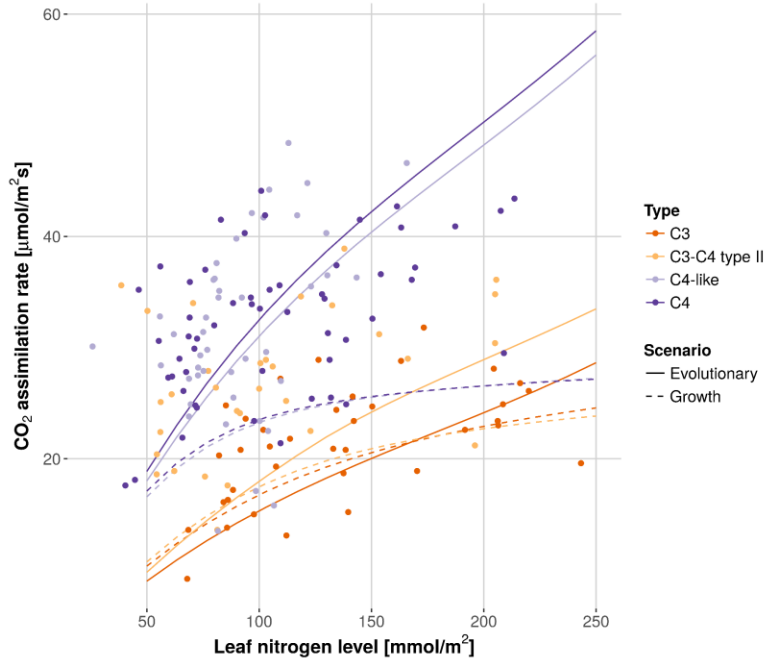

740

741 **Figure 3** The dependence of the CO<sub>2</sub> assimilation rate on leaf nitrogen levels for various *Flaveria* species  
742 is consistent with model results based on optimality in the evolutionary scenario (solid lines). For C<sub>3</sub>-C<sub>4</sub>  
743 intermediate, C<sub>4</sub>-like, and C<sub>4</sub> these results outperform the ones assuming optimal phenotypic adaptation  
744 to the growth conditions (dashed lines). The modeled species are *F. pringlei* (C<sub>3</sub>), *F. floridana* (C<sub>3</sub>-C<sub>4</sub>),  
745 *F. palmeri* (C<sub>4</sub>-like), and *F. bidentis* (C<sub>4</sub>) (data from Vogan and Sage (2011)).

746

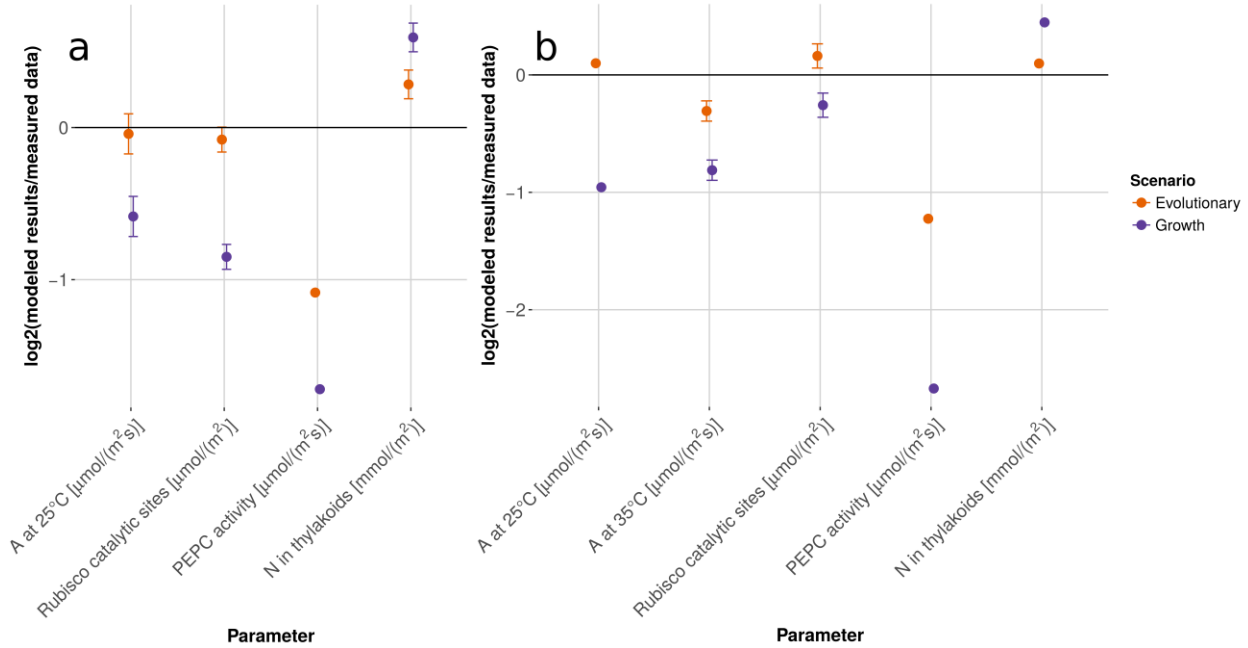

747

748 **Figure 4** A detailed analysis of resource allocation and physiology in *F. bidentis* ( $C_4$ ) shows a good

749 agreement between experimental data (Dwyer *et al.*, 2007) and model results based on the evolutionary

750 scenario (orange dots). Alternative model results assuming optimal phenotypic adaptation to the growth

751 scenario consistently show higher disagreement with the data (purple dots). Values are mean

752  $\log_2(\text{modeled results}/\text{measured data}) \pm \text{SE}$ . (a) Plants grown at 25°C (b) Plants grown at 35°C. A = net  $\text{CO}_2$

753 assimilation rate; N = nitrogen.

754

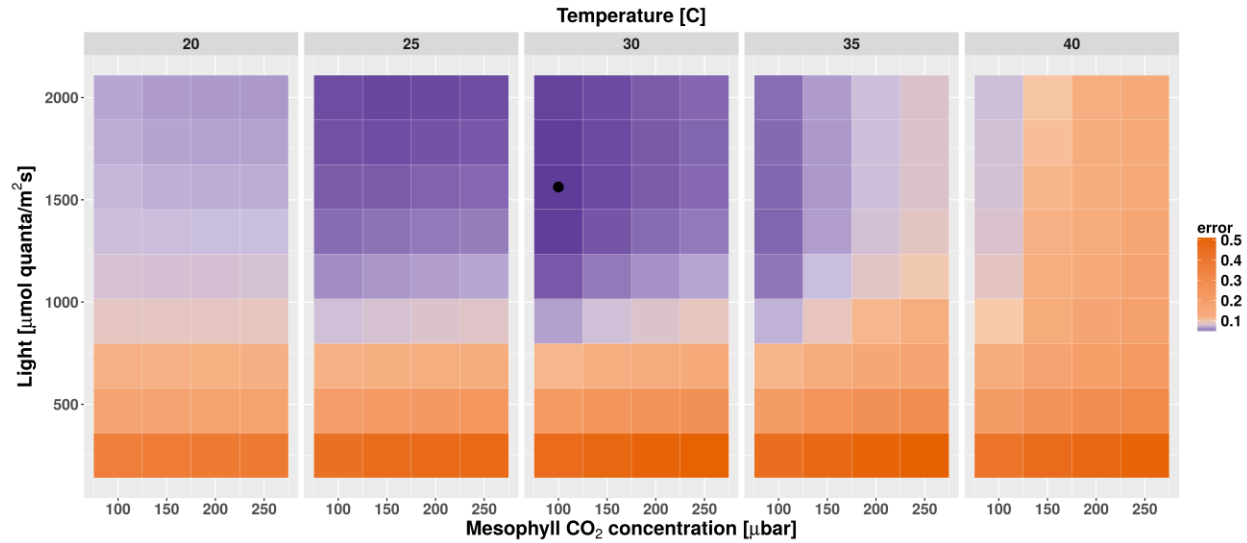

755

756 **Figure 5** Discrepancy between measured and modeled *F. bidentis* data across diverse environments. The  
757 black dot indicates the environment that best explains the experimental data of Dwyer *et al.* (2007). The  
758 deviation between model predictions and measurements ('error') is defined as the mean of the squared  
759 residuals (which are expressed as fractions of experimental means).

760
